# Supplementary material for: Workforce Participation, Ageing, and Economic Welfare: New Empirical Evidence on Complex Patterns across the European Union
Source: Hindawi journal article supplement (doi:10.1155/2022/7313452), 2022-01-01
Supplement: f1 [file 7313452.f1.docx]

# Complexity

# Workforce Participation,Ageing and Economic Welfare: New Empirical Evidence on Complex Patterns across the European Union

Mirela Cristea 1, Marilen G. Pirtea 2, Marta C. Suciu 3, and Grațiela G. Noja 4

1 Department of Finance, Banking and Economic Analysis, Faculty of Economics and Business Administration, University of Craiova, 200585 Craiova, Romania.

2 Department of Finance, Faculty of Economics and Business Administration, West University of Timisoara, 300115 Timisoara, Romania.

3 Department of Economics and Economic Policies, Faculty of Theoretical and Applied Economics, The Bucharest University of Economic Studies, 010374 Bucharest, Romania.

4 Department of Marketing and International Economic Relations, Faculty of Economics and Business Administration, West University of Timisoara, 300115 Timisoara, Romania.

## Appendix

Table A-Ia: Summary statistics, EU–1 panel, 1995–2018.

| Variables | N | mean | sd | min | max |
| --- | --- | --- | --- | --- | --- |
| GDP_C | 264 | 17902.8 | 9327.237 | 3756.751 | 38272.2 |
| LP | 165 | 77.34545 | 19.12462 | 36.7 | 117 |
| ER_55_64 | 250 | 39.2828 | 9.352657 | 17.1 | 64.4 |
| Active_pop | 253 | 8778.221 | 7997.389 | 931 | 25340 |
| GERD | 260 | 0.9072308 | 0.41504 | 0.024 | 2.56 |
| Edu_acq | 275 | 64.192 | 16.38849 | 19.3 | 86.7 |
| EARN | 235 | 26156 | 11047.28 | 1723.02 | 46212.91 |
| LE | 258 | 76.83101 | 3.569157 | 68.8 | 83.5 |
| BR | 264 | 9.739015 | 0.8362694 | 7.3 | 12.2 |
| OD_65 | 269 | 24.55874 | 4.607891 | 16.3 | 35.7 |
| PLMP | 177 | 0.7255876 | 0.6079116 | 0.04 | 3.126 |
| POV_R_65 | 200 | 18.67 | 8.306267 | 4.1 | 39.3 |
| ALMP | 173 | 0.3283988 | 0.1979954 | 0.019 | 0.873 |

*Source:* authors’ process.

Table A-Ib: Summary statistics, EU–2 panel, 1995–2018.

| Variables | N | mean | sd | min | max |
| --- | --- | --- | --- | --- | --- |
| GDP_C | 144 | 45688.33 | 25814.06 | 14750.55 | 111968.4 |
| LP | 90 | 119.2489 | 26.26916 | 83.6 | 177.3 |
| ER_55_64 | 146 | 38.40685 | 9.817919 | 22.2 | 61.1 |
| Active_pop | 146 | 6267.171 | 9727.846 | 152 | 28628 |
| GERD | 144 | 1.492528 | 0.8507598 | 0.159 | 3.17 |
| Edu_acq | 150 | 61.58667 | 15.4673 | 17.1 | 81.3 |
| EARN | 122 | 46797.85 | 11830.58 | 24220.53 | 73087.41 |
| LE | 144 | 79.9375 | 1.765951 | 76.8 | 82.9 |
| BR | 144 | 11.25903 | 1.294119 | 9.2 | 15.2 |
| OD_65 | 150 | 23.03733 | 3.765822 | 16.4 | 32.5 |
| PLMP | 105 | 0.4328571 | 0.2429946 | 0.031 | 1.031 |
| POV_R_65 | 109 | 1.232853 | 0.6881722 | 0.04 | 2.443 |
| ALMP | 123 | 17.73415 | 9.173204 | 4.7 | 51.9 |

*Source*: authors’ process.

Table A-Ic: Summary statistics, EU–3 panel, 1995–2018.

| Variables | N | mean | sd | min | max |
| --- | --- | --- | --- | --- | --- |
| GDP_C | 168 | 18388.97 | 10348.81 | 5139.303 | 47477.84 |
| LP | 105 | 88.7 | 32.39643 | 52.4 | 193.6 |
| ER_55_64 | 166 | 51.45904 | 9.066696 | 36.1 | 72.7 |
| Active_pop | 166 | 8260.614 | 13656.59 | 644 | 42424 |
| GERD | 168 | 1.229065 | 0.6942595 | 0.241 | 3.13 |
| Edu_acq | 175 | 71.62571 | 18.18336 | 19.3 | 88.9 |
| EARN | 140 | 29971.81 | 15386.25 | 6028.63 | 64664.12 |
| LE | 161 | 76.33043 | 3.532935 | 67.7 | 82.3 |
| BR | 168 | 10.4744 | 2.076097 | 7.6 | 16.7 |
| OD_65 | 175 | 24.36514 | 4.632827 | 15.6 | 33.9 |
| PLMP | 127 | 0.3558819 | 0.2557733 | 0.023 | 1.098 |
| POV_R_65 | 127 | 0.8074961 | 0.6424642 | 0.079 | 2.784 |
| ALMP | 132 | 21.58864 | 11.25972 | 5.3 | 52 |

*Source*: authors’ process.

Table A-Id: Summary statistics, EU–4 panel, 1995–2018.

| Variables | N | mean | sd | min | max |
| --- | --- | --- | --- | --- | --- |
| GDP_C | 120 | 47474.38 | 7917.899 | 30679.54 | 63873.46 |
| LP | 75 | 112.1 | 5.42442 | 99.7 | 121.2 |
| ER_55_64 | 123 | 57.38618 | 10.63716 | 29 | 78 |
| Active_pop | 123 | 9830.211 | 10539.27 | 2367 | 32631 |
| GERD | 120 | 2.502517 | 0.749276 | 1.53 | 3.914 |
| Edu_acq | 125 | 71.9244 | 6.342711 | 50.5 | 83.1 |
| EARN | 100 | 49250.06 | 8614.157 | 29480.18 | 69071.02 |
| LE | 120 | 79.63417 | 1.746377 | 75.3 | 82.6 |
| BR | 120 | 11.44667 | 0.9155916 | 8.6 | 13.3 |
| OD_65 | 125 | 25.4584 | 3.47997 | 19.3 | 35.1 |
| PLMP | 92 | .9155326 | 0.4245109 | 0.034 | 2.082 |
| POV_R_65 | 98 | 1.363347 | 0.6813816 | 0.15 | 3.016 |
| ALMP | 103 | 15.18835 | 6.290271 | 4 | 32 |

*Source:* authors’ process.

Figure A-I: Graphical Mapping of AAI Clustering for the countries considered in the empirical analysis, EU-27 Member States, 2018.

*Source:* authors’ process in Stata 16.

1. (b)

Figure A-II: The welfare indicators, EU–27, 2018: (a) *GDP_C*. (b) *POV_R_65.*

*Source*: authors’ process, data from the WDI [9] and Eurostat [35]

1. (b)

(c)

Figure A-III: The ageing indicators, EU–27, 2018: (a) BR. (b) LE. (c) OD_65.

*Source*: authors’ process, data from Eurostat [35]

1. (b)

(c)

Figure A-IV: The main labor market indicators, EU–27, 2018: (a) LP. (b) ALMP. (c) PLMP.

*Source*: authors’ processing, data from Eurostat [35] and the Employment, Social Affairs & Inclusion [21]
